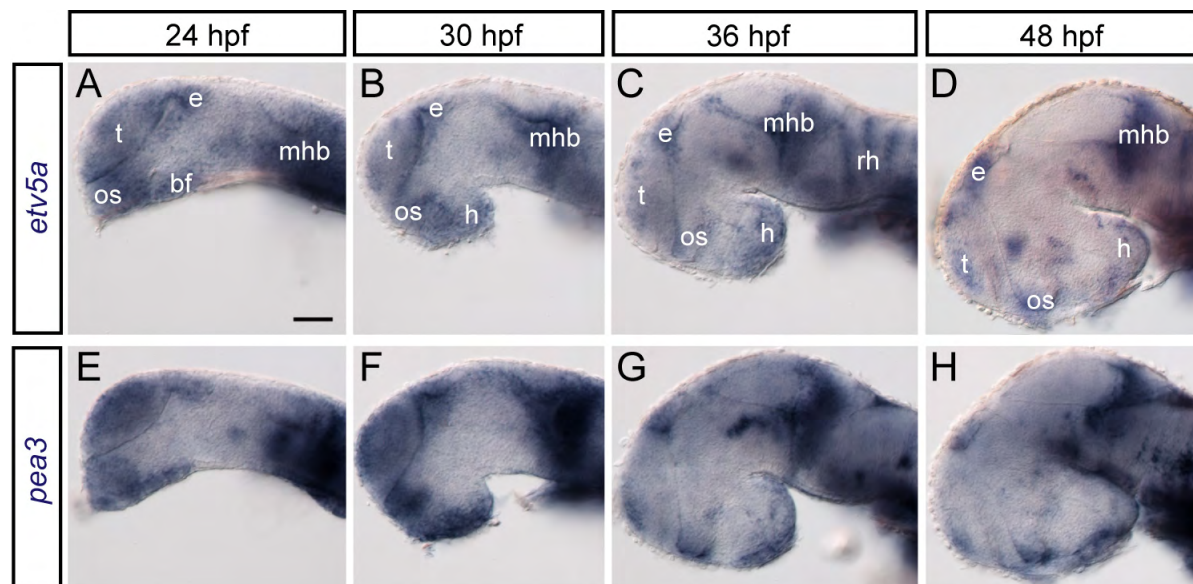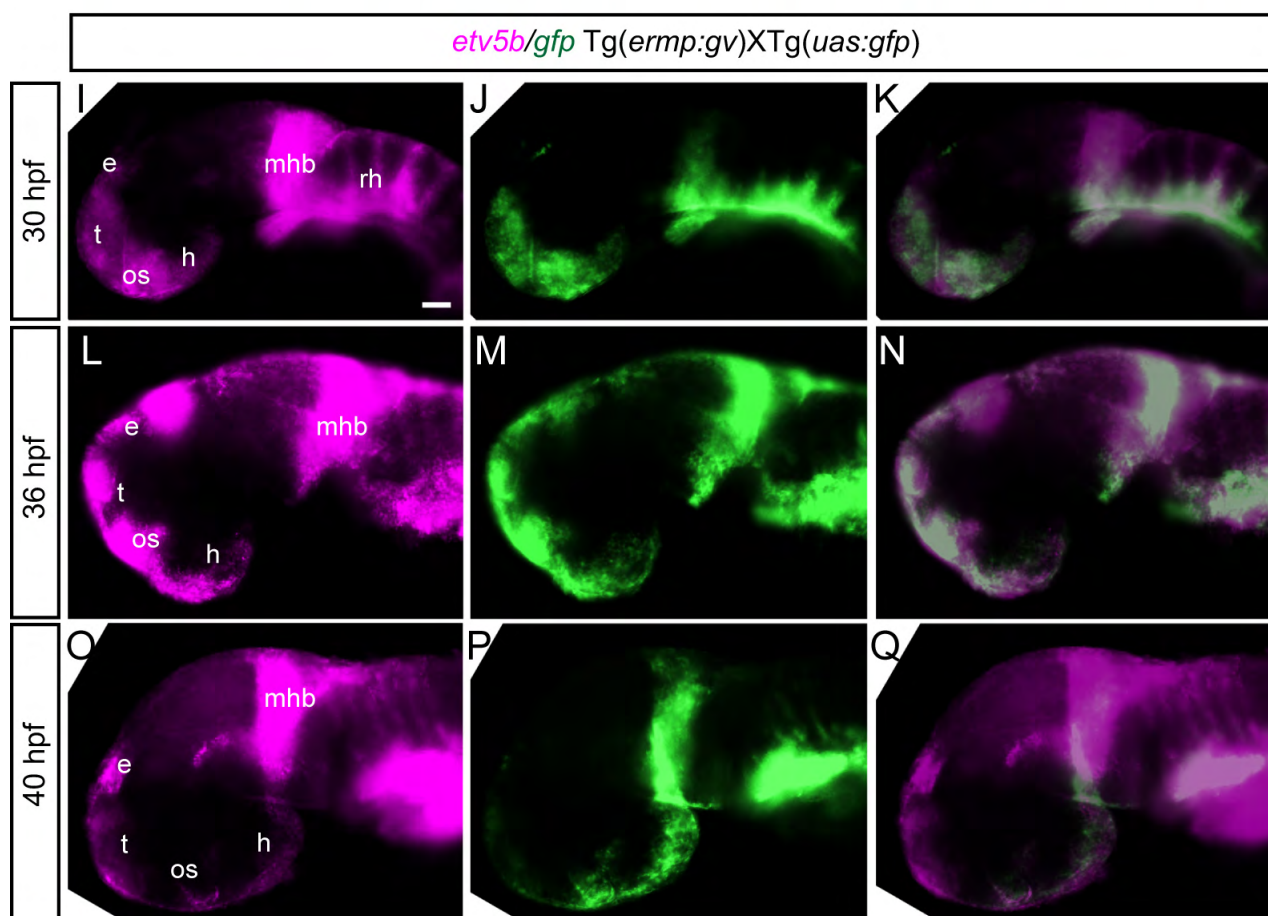

**Fig. S1. *etv5a* and *pea3* are expressed by the developing hypothalamus but at lower levels/in a more restricted fashion than *etv5b*.** (A-H) Expression of *etv5a* and *pea3* (whole-mounts). At 24 hpf, *etv5a* transcripts were present in the telencephalon (t), pineal/epithalamus (e), basal forebrain (bf), optic stalk (os), mid-hindbrain boundary (mhb) and rhombencephalon (rh). Progressively, the expression domain in the basal forebrain narrowed, and by 30 and 36 hpf it was present in the ventral/caudal hypothalamus (h). Expression persisted in this region at low levels until 48 hpf. *pea3* was expressed in a more restricted manner in the forebrain at 24 hpf, and from 30 hpf onwards its expression in the basal forebrain was limited to a stripe at the distal limits of the hypothalamus. (I-Q) Fluorescent microscopy images of Tg(*ermp:gv*)X Tg(*uas:gfp*) transgenic embryos (whole-mount) processed for double *gfp/etv5b* ISH. Lateral views, anterior left. Scale bars: 50  $\mu$ m.

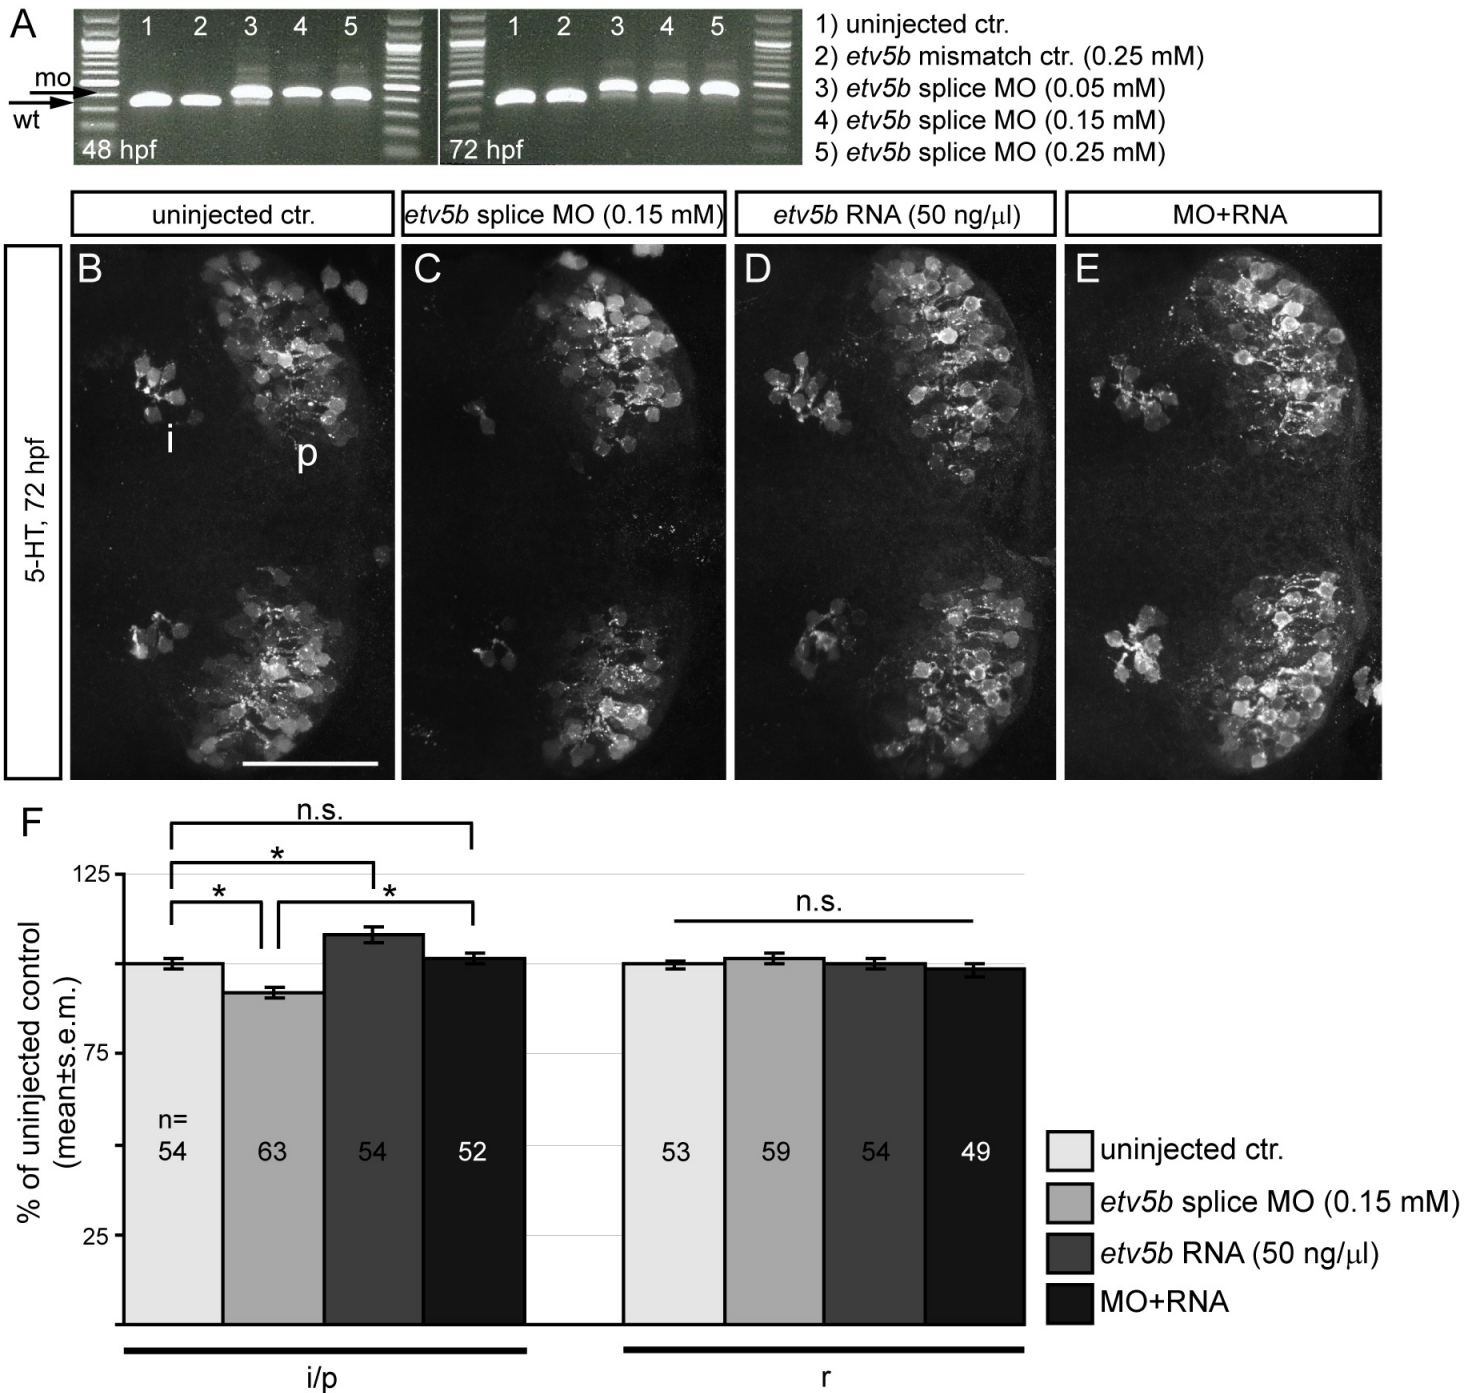

**Fig. S2. *etv5b* overexpression rescues the 5-HT phenotype seen in *etv5b* splice morphants.** (A) RT-PCR on total RNA extracted from 48 or 72 hpf pooled ( $n=6$ ), uninjected or mismatch controls as well as embryos injected with increasing concentrations of *etv5b* splice MO. Injection of the splice MO results in almost complete loss of the wild-type band (wt) and the presence of a morphant band (mo) corresponding to an insertion of the entire intron 10 (79 bp), which in the amino acid sequence results in a premature stop codon. (B-E) Confocal maximum intensity projections showing embryos after RNA rescue of the *etv5b* splice MO phenotype. Embryos were subjected to the indicated treatments and processed for 5-HT immunohistochemistry (dissected brains). The intermediate/posterior (i./p.) clusters of the hypothalamus are shown. Ventral views, anterior left. Scale bar: 50  $\mu$ m. (F) The number of 5-HT cells obtained in the rescue experiment in the i./p. and anterior raphe (r.) clusters at 72 hpf after the indicated treatments expressed as percentage of control. *etv5b* splice MO alone results in a significant decrease in the number of 5-HT-expressing cells as compared with uninjected control siblings ( $92.3\pm 1.5\%$ ,  $P=6.6\times 10^{-4}$ ), whereas *etv5b* RNA injections led to a significant increase ( $108.3\pm 2.1\%$ ,  $P=2.07\times 10^{-3}$ ).  $n$ , total number of embryos analysed for each experiment. \* $P\leq 0.05$ ; n.s., not significant.

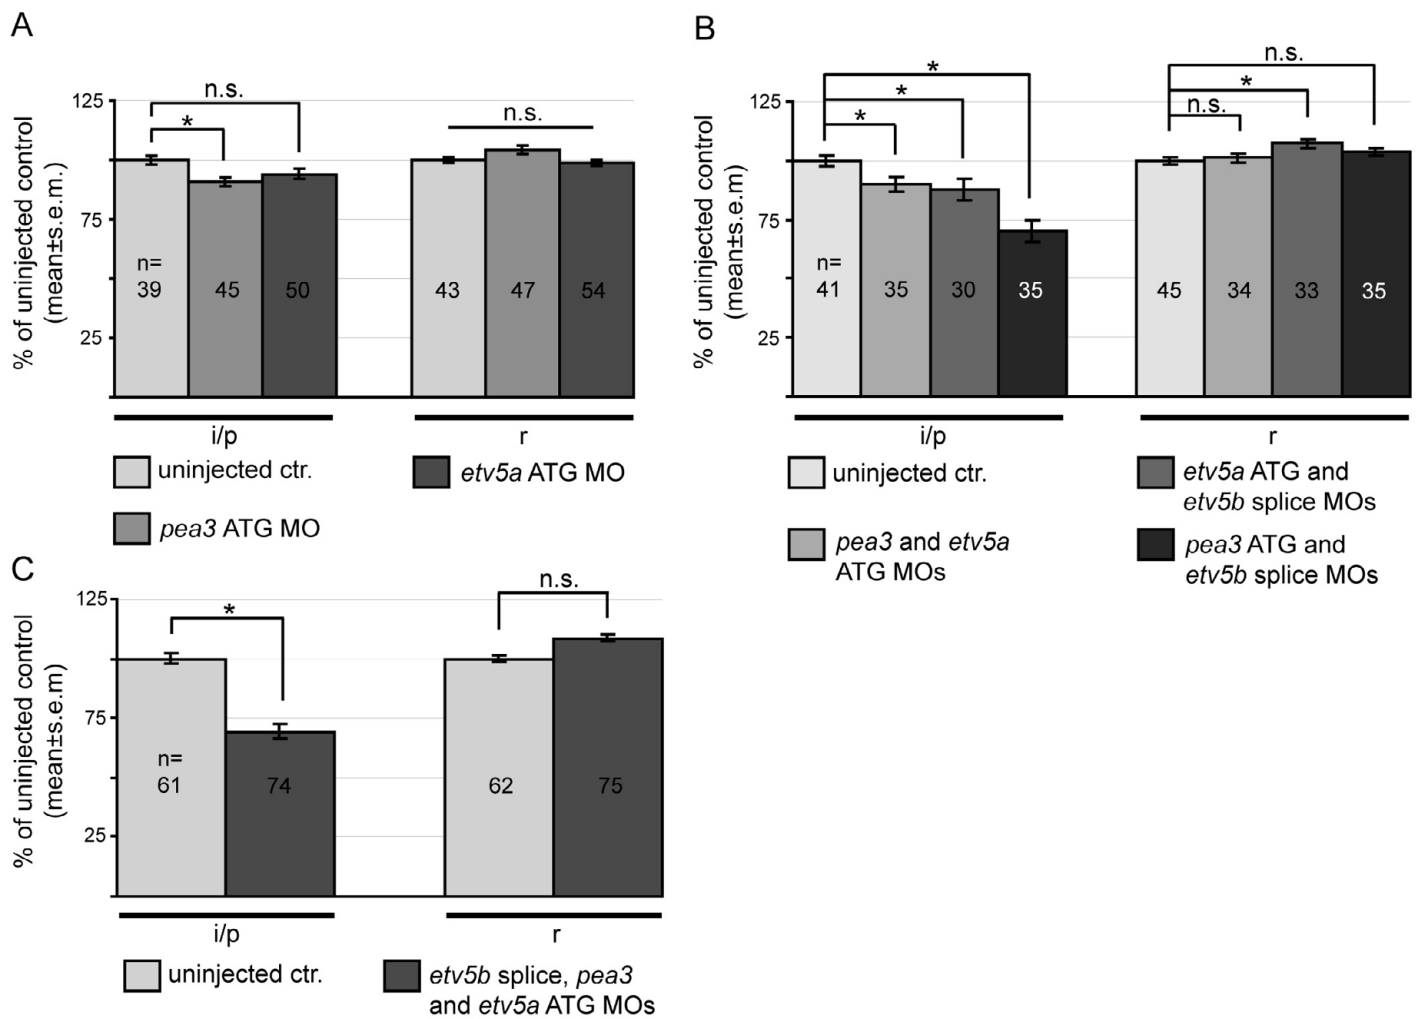

**Fig. S3. *pea3*-deficient but not *etv5a*-deficient embryos exhibit a reduced number of 5-HT cells in the hypothalamus.** (A-C) The number of 5-HT cells in the intermediate/posterior (i./p.) clusters of the hypothalamus and the anterior raphe (r.) 5-HT population at 72 hpf in controls, *pea3* (0.15 mM) or *etv5a* (0.05 mM) ATG morphants expressed as percentage of control. The *pea3* and *etv5a* ATG MOs were also co-injected with the *etv5b* splice MO (0.15 mM) to generate all possible double and triple combinations. In the triple combination, the *pea3* and *etv5b* splice MO concentrations were reduced to 0.1 mM. *n*, total number of embryos analysed for each experiment. \* $P \leq 0.05$ ; n.s., not significant.



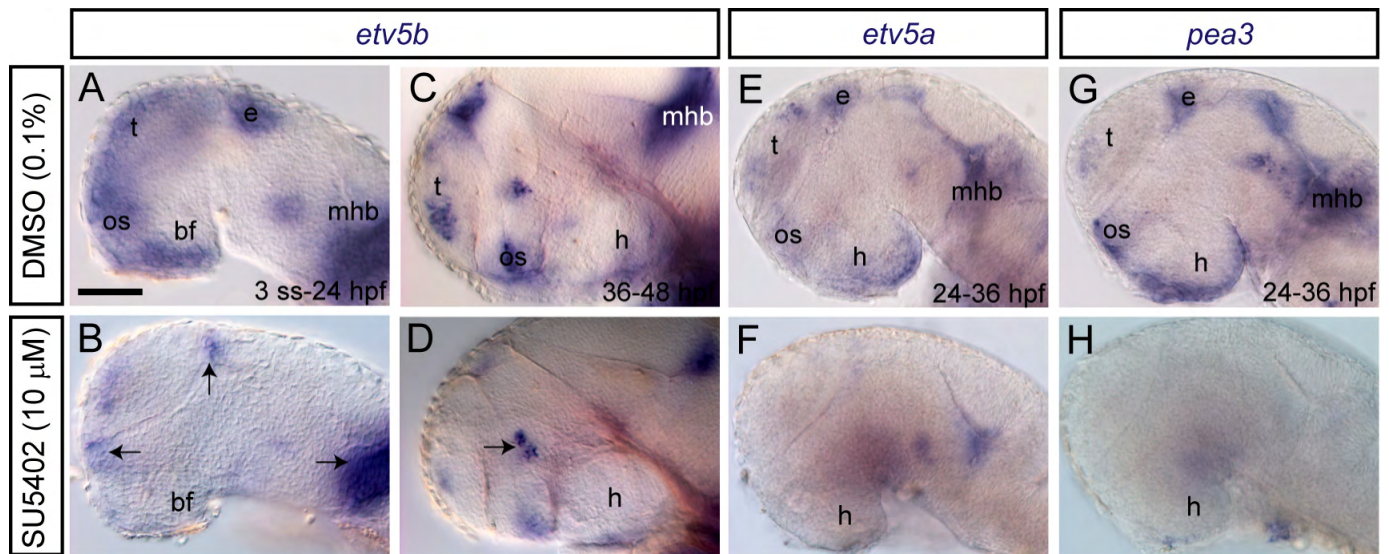

**Fig. S4. Fgf loss-of-function downregulates expression of *pea3* family members.** (A-H) Embryos were treated with SU5402 during the developmental stages indicated, fixed directly after treatment and analysed for *etv5b*, *etv5a* or *pea3* expression (whole-mounts). Following SU5402 treatment, no *etv5b* transcripts were detected in the basal forebrain (bf), including hypothalamus (h), although transcripts were still detectable in some of the domains normally expressing *etv5b*, including the telencephalon (t), mid-hindbrain boundary (mhb), optic stalk (os) and pineal/epithalamus (e) (B, arrows) and ventral thalamus (D, arrow). SU5402 treatment also abolished *etv5a* and *pea3* expression in the hypothalamus as well as in other domains where they are normally expressed. Lateral views, anterior left. Scale bar: 50 μm.

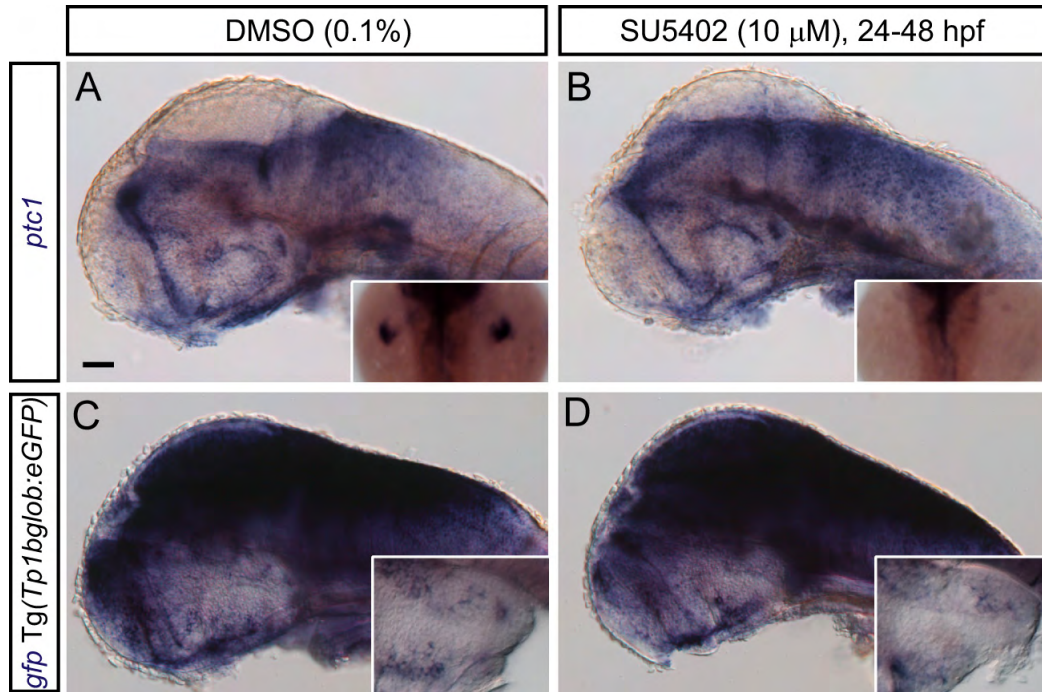

**Fig. S5. Hedgehog and Notch signalling are not differentially regulated by Fgf signalling within the hypothalamus during embryonic development.** Micrographs showing DMSO controls and SU5402-exposed (24-48 hpf) wild-type embryos processed for *ptc1* (A,B) or Notch reporter [Tg(*Tp1bglob:eGFP*)] embryos processed for *gfp* ISH (C,D) at 48 hpf (whole-mounts). Insets in A and B show downregulation of *ptc1* expression in pectoral fin buds (dorsal view, anterior up). Insets in C and D show *gfp* signal in hypothalamus after a shorter signal development time. No up- or downregulation of *ptc1* or *gfp* was observed in hypothalamus. Lateral views, anterior left. Scale bar: 50  $\mu$ m.



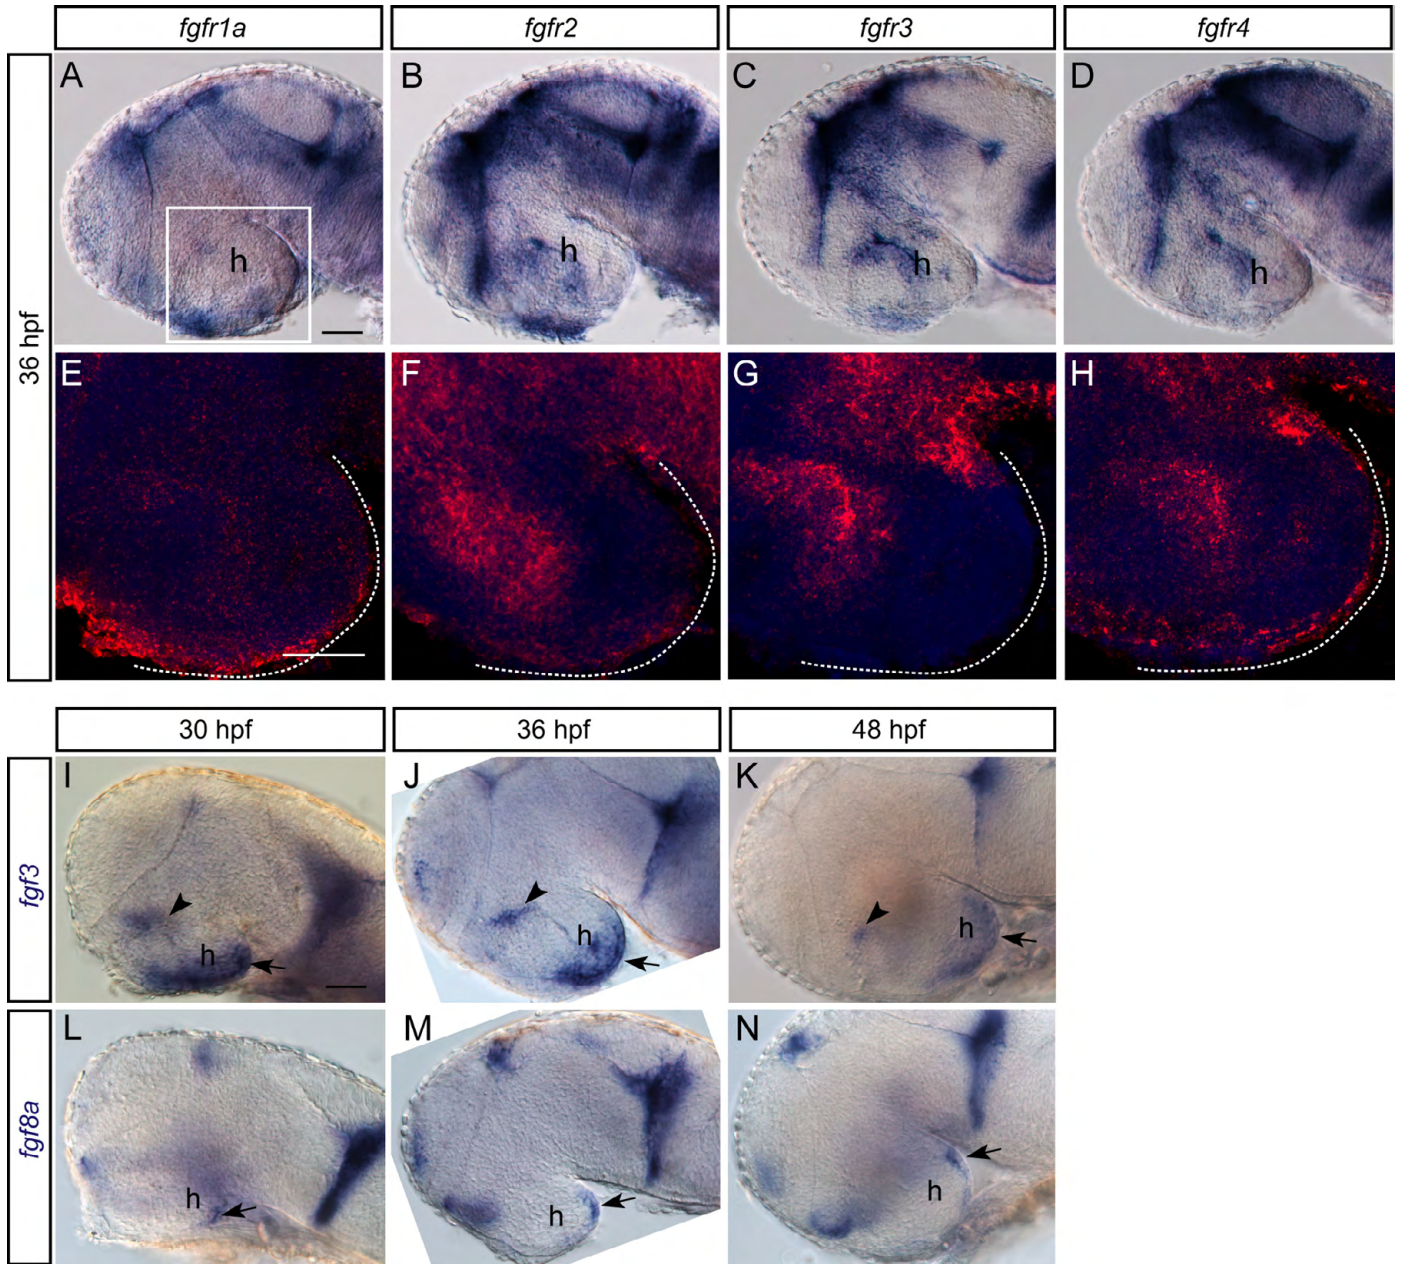

**Fig. S6. Fgf receptors and ligands are expressed in the hypothalamus at a stage when 5-HT progenitors are proliferating.** (A-D) *fgfr1a*, 2, 3 and 4 expression in whole-mount embryos. (E-H) Confocal maximum intensity projections of embryos processed for fluorescent ISH (red) and counterstained with DAPI (blue) covering 30 μm around the midline corresponding to boxed area in A. Transcripts for *fgfr1a*, 2 and 4, but not *fgfr3*, were detectable in the caudal hypothalamus (dashed line). (I-N) Expression of *fgf3* and *fgf8a* in whole-mount embryos. At all stages analysed, both transcripts were detectable in the hypothalamus (h). However, *fgf3* exhibited a broader expression domain covering the entire caudal/ventral hypothalamus (arrows) and a restricted part of the posterior tuberculum/hypothalamus (arrowheads) (I-K), whereas *fgf8a* was limited to an area in the most caudal/dorsal hypothalamus (arrows) (L-N). Lateral views, anterior left. Scale bars: 50 μm.

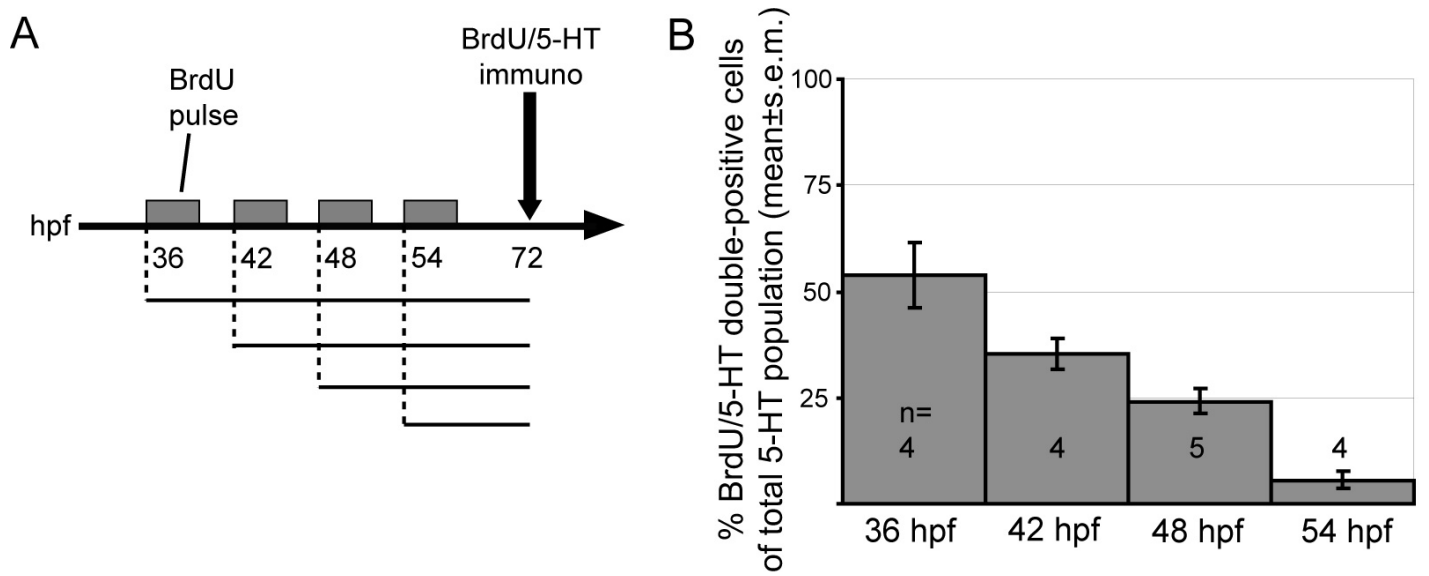

**Fig. S7. Proliferating 5-HT progenitors leave the cell cycle before 54 hpf.** (A) Scheme illustrating the procedure for temporal analysis of proliferation rate among 5-HT progenitors in the hypothalamic intermediate/posterior (i./p.) clusters by repeated BrdU treatment of embryos starting at 36, 42, 48 or 54 hpf. (B) The proportion of 5-HT/BrdU double-positive cells among the 5-HT-positive population in the i./p. clusters at 72 hpf after repeated BrdU pulses, expressed as percentage of control. These results suggest that the majority of the hypothalamic 5-HT progenitor population has left the cell cycle by 54 hpf. *n*, total number of embryos analysed for each experiment.

**Table S1. Primary antibodies and *in situ* hybridisation probes**

| <b>Antibody</b>               | <b>Dilution</b>                  | <b>Source</b>                       | <b>Number</b> |
|-------------------------------|----------------------------------|-------------------------------------|---------------|
| Rabbit anti-GFP               | 1:500                            | Acris Antibodies                    | TP401         |
| Rabbit anti-5-HT              | 1:2500                           | Sigma                               | S5545         |
| Rat anti-5-HT                 | 1:100                            | Millipore                           | MAB352        |
| Mouse anti-TH1                | 1:300                            | Millipore                           | MAB318        |
| Rat anti-BrdU                 | 1:200                            | Abcam                               | ab6326        |
| Rabbit anti-ph-H3             | 1:300                            | Millipore                           | 06-570        |
| Rabbit anti-mKO2              | 1:100                            | Medical and Biological Laboratories | M168-3        |
| Mouse anti-mAG                | 1:100                            | Medical and Biological Laboratories | PM052         |
| Rabbit anti-cleaved caspase 3 | 1:250                            | Cell Signaling                      | 9661          |
| <b>Probe</b>                  | <b>Reference</b>                 |                                     |               |
| <i>avpl</i>                   | Eaton et al., 2008               |                                     |               |
| <i>etv5a</i>                  | Roussigné and Blader, 2006       |                                     |               |
| <i>etv5b</i>                  | Münchberg et al., 1999           |                                     |               |
| <i>fgf3</i>                   | Kiefer et al., 1996              |                                     |               |
| <i>fgf8a</i>                  | Reifers et al., 1998             |                                     |               |
| <i>fgf8b</i>                  | Reifers et al., 2000             |                                     |               |
| <i>fgfr1a</i>                 | Rohner et al., 2009              |                                     |               |
| <i>fgfr2</i>                  | Tonou-Fujimori et al., 2002      |                                     |               |
| <i>fgfr3</i>                  | Sleptsova-Friedrich et al., 2001 |                                     |               |
| <i>fgfr4</i>                  | Sleptsova-Friedrich et al., 2001 |                                     |               |
| <i>nkx2.1a</i>                | Rohr et al., 2001                |                                     |               |
| <i>oxtl</i>                   | Unger and Glasgow, 2003          |                                     |               |
| <i>pea3</i>                   | Münchberg et al., 1999           |                                     |               |
| <i>ptc1</i>                   | Concordet et al., 1996           |                                     |               |
| <i>sst3</i>                   | Devos et al., 2002               |                                     |               |
